# Supplementary material for: Antioxidant Potential-Rich Betel Leaves (Piper betle L.) Exert Depigmenting Action by Triggering Autophagy and Downregulating MITF/Tyrosinase In Vitro and In Vivo
Source: MDPI journal article supplement (doi:10.3390/antiox12020374), 2023-02-03
Supplement: s1 [file s1]

## **Supplementary data set**

### **Antioxidant potential-rich Betel leaves (*Piper betle* L.) exert depigmenting action by triggering autophagy and downregulating MITF/Tyrosinase in vitro and in vivo**

Md Badrul Alam<sup>1,2</sup>, Na Hyun Park<sup>1</sup>, Bo-Rim Song<sup>1</sup> and Sang-Han Lee<sup>1,2,\*</sup>

<sup>1</sup>Department of Food Science and Biotechnology, Graduate School, Kyungpook National University, Daegu 41566, Republic of Korea

<sup>2</sup>Food and Bio-Industry Research Institute, Inner Beauty/Antiaging Center, Kyungpook National University, Daegu 41566, Republic of Korea

\*Corresponding author:

Dr. Sang-Han Lee; Department of Food Science and Biotechnology, Kyungpook National University, Daegu 41566, Korea, Phone: (82)053-950-7754 (Office); Fax: 053-950-6772; Email: sang@knu.ac.kr

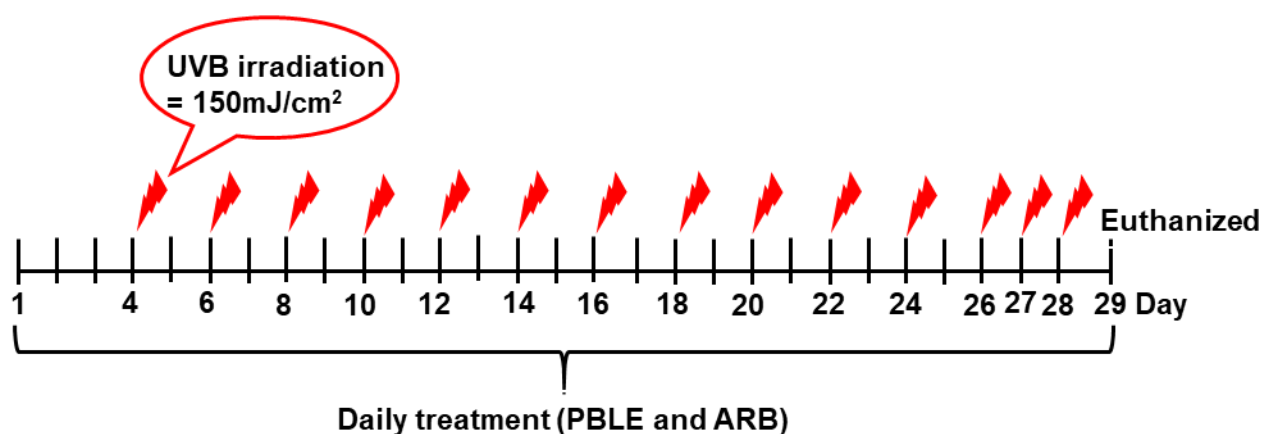

**Figure S1.** Experimental schedule for conducting the depigmenting effect of PBLE on UVB-induced pigmentation of HRM-2 mice. HRM-2 melanin-possessing hairless mice were treated with the vehicle or PBLE on a designated site on the dorsal skin, according to the indicated schedules. ARB: arbutin.

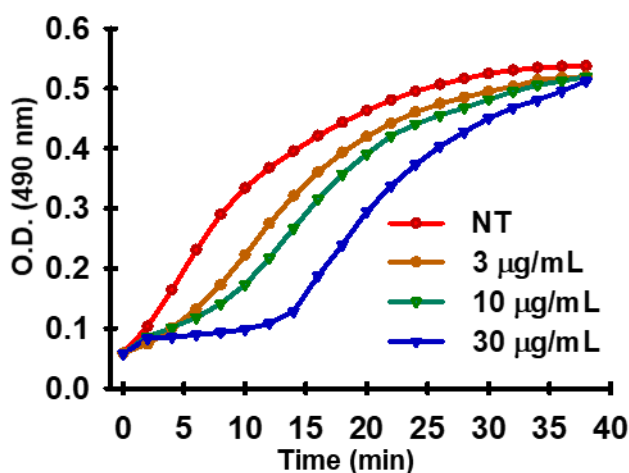

**Figure S2.** Effects of PBLE on the monophenolase activity of tyrosinase. Enzyme activity was tested in the presence of L-tyrosine, as a substrate. Results are presented as the means  $\pm$  SDs of three experiments.

**Table S1. List of antibodies used in this study.**

| <b>Antibody</b>      | <b>Dilution</b> | <b>Supplier</b>           | <b>Catalog No.</b> | <b>Host</b> | <b>MW,<br/>kDa</b> |
|----------------------|-----------------|---------------------------|--------------------|-------------|--------------------|
| Anti-TYR             | 1:1000          | Abcam, Cambridge, UK      | ab170905           | Rabbit      | 60                 |
| Anti-TRP-1           | 1:1000          | Abcam, Cambridge, UK      | ab235447           | Rabbit      | 61                 |
| Anti-TRP-2           | 1:1000          | Abcam, Cambridge, UK      | ab221144           | Rabbit      | 59                 |
| Anti-MITF            | 1:1000          | Abcam, Cambridge, UK      | ab140606           | Rabbit      | 58                 |
| Anti-p-p38           | 1:500           | Bioworld Technology, Inc. | BS4635             | Rabbit      | 42                 |
| Anti-p38             | 1:500           | Bioworld Technology, Inc. | BS3567             | Rabbit      | 42                 |
| Anti-p-ERK1/2        | 1:500           | Bioworld Technology, Inc  | BS5016             | Rabbit      | 42,44              |
| Anti-ERK1/2          | 1:500           | Bioworld Technology, Inc. | BS 6472            | Rabbit      | 42,44              |
| Anti-JNK             | 1:500           | Bioworld Technology, Inc. | BS3630             | Rabbit      | 46,54              |
| Anti-p-JNK           | 1:500           | Bioworld Technology, Inc. | BS4322             | Rabbit      | 46,54              |
| Anti-CREB            | 1: 1000         | Abcam, Cambridge, UK      | ab31387            | Rabbit      | 43                 |
| Anti-p-CREB          | 1:1000          | Abcam, Cambridge, UK      | ab194687           | Rabbit      | 43                 |
| Anti-LC3             | 1: 2000         | Abcam, Cambridge, UK      | ab192890           | Rabbit      | 15                 |
| Anti-ATG5            | 1:10000         | Abcam, Cambridge, UK      | ab108327           | Rabbit      | 55                 |
| Anti-Becclin1        | 1: 5000         | Abcam, Cambridge, UK      | ab207612           | Rabbit      | 52                 |
| Anti-p62             | 1:10000         | Abcam, Cambridge, UK      | ab109012           | Rabbit      | 55                 |
| Anti- $\beta$ -actin | 1:1000          | Abcam, Cambridge, UK      | ab8227             | Rabbit      | 45                 |
